# Supplementary material for: Payment systems and hospital length of stay: a bunching-based evidence
Source: Springer Nature journal article supplement (doi:10.1007/s10754-018-9243-2), 2018-05-04
Supplement: MOESM1 [file 15739516]

Online Appendix

## Theoretical Discussion

In the main text, we argue that revenue raising behavior by health care providers may be restrained if out- of-pocket costs are linked to the health care costs. This appendix provides a brief theoretical discussion on this hypothesis. As the manipulation of hospital acceptance time can be broadly regarded as an example of SID, our model is essentially based on the SID theory as discussed in [Brunt](#_bookmark2) ([2015](#_bookmark2)), who examined upcoding behavior in the context of demand inducement. The basic theoretical model is derived from the utility function proposed by [Ellis and McGuire](#_bookmark11) ([1986](#_bookmark11)), in which a physician acts as a double agent to both his patients and the hospital, and chooses treatments that patients willingly accept.

In the application of this model to the Japanese context, it should be noted that hospital physicians work for a salary, which is not tied to their practice load ([Ikegami and Campbell](#_bookmark23), [1995](#_bookmark23); [Shigeoka and Fushimi](#_bookmark41), [2014](#_bookmark41)). This distinguishes our model from the standard assumption of a conventional SID model in which physicians are concerned with their own income, but not institutional revenue. Based on [He and Mellor](#_bookmark18) ([2012](#_bookmark18)) and [Shigeoka and Fushimi](#_bookmark41) ([2014](#_bookmark41)), we argue that in this context, physicians consider the revenue of the hospital rather than their own income and the private costs/benefits of demand inducement, as described in the following utility function:

*U* = *U* (*π*(*I*)*, B*(*I*))*,* (2)

where *π* is the net revenue of the hospital, and *B* is the patient’s expected net benefit from demand inducement (*I*), which is evaluated by the physicians. We can also assume that *Uπ >* 0, *UB >* 0, *Uππ <* 0 and *UBB <* 0.26 The key assumption in this equation is that the inducement invariably reduces the net benefits of the patient, namely *BI <* 0. In our context, the manipulation of hospital acceptance times would result in additional out-of-pocket expenditures for patients without any improvement in health, indicating that *BI <* 0. The equilibrium level of inducement is given when we solve the following first order condition:

*∂U ∂U ∂B θ* +

*∂π ∂B ∂I*

= 0*,* (3)

where *θ* is a financial incentive factor of the inducement, which meets the condition *π* = *θI*.

Next, we discuss the relationships between demand inducement behavior, the financial incentive and the characteristics of the treatment provided. The last factor is particularly important because previous studies on SID have addressed various medical treatments such as coronary artery bypass graft surgeries ([Yip](#_bookmark45), [1998](#_bookmark45)), chemotherapy for lung cancer patients ([Jacobson et al](#_bookmark24), [2010](#_bookmark24)) and newborn treatments in neonatal intensive care units ([Shigeoka and Fushimi](#_bookmark41), [2014](#_bookmark41)). In our model, the characteristics of medical treatments are incorporated into the term *BI* . If an inducement causes substantial harm to a patient, *BI* takes a large

26For the sake of simplicity, the private costs/benefits of the inducement are assumed to be negligible.

negative value; otherwise, it takes a small value in the absolute term. Intuitively, the responsiveness of physicians to financial incentives varies according to the value of *BI* . For example, physicians may treat their patients aggressively if *BI* takes a slightly negative value. On the other hand, physicians may be less inclined to over-treat their patients if it causes harm, since they would generally be concerned about their patients’ net benefits (*B*).

In our model, the impact of financial incentives on the degree of SID was derived from Equation (2), and was calculated as follows:

*dI*

*dθ* = *−*

*U* (1 *ρ*)

*,* (4)

*π −*

*Uππ θ*2 + *UBB* (*BI* )2 + *UB BII*

where *ρ* is a parameter of relative risk aversion in hospital revenue (*ρ* = *− πUππ* ). Since the utility function is concave for *B* and *π*, the denominator is always negative with a reasonable assumption of *BII ≤* 0. The numerator takes a positive value when *ρ* is less than 1. This assumption is plausible because EMS providers may be almost risk neutral with respect to the revenue of their hospital, implying that *ρ* takes a very low

*Uπ*

value. Finally, we have *dI*

*dθ*

*>* 0, which suggests that greater financial incentives trigger the manipulation of

hospital acceptance time. On the other hand, the value of *dI*

*dθ*

may be very small if the treatment is harmful

because it decreases when *BI* takes a large absolute value. This indicates that financial incentives *per se* are not the fundamental cause of SID. Rather, the amount of harmful behavior based on SID is closely related to each physician’s subjective evaluation on patient net benefit. This point echoes the findings from an experimental study by [Hennig-Schmidt et al](#_bookmark20) ([2011](#_bookmark20)).

Finally, we briefly address two implications of the manipulation of hospital acceptance time in Japan. First, the manipulation of hospital acceptance time would unequivocally deteriorate each patient’s net benefit, even without taking into account the possible eﬀects on patient health. In particular, an emergency patient with mild symptoms who are accepted by a hospital a few minutes before midnight would not receive any additional health benefits, but their copayment would increase substantially. We also note that EMS providers are likely aware of this situation when they rush to accept emergency patients before midnight. In these cases, *BI* may take a large value, and EMS providers may refrain from manipulating the acceptance times. On the other hand, it is also possible that we may observe a large degree of manipulation (as seen in previous studies) if EMS providers act selfishly as predicted by the standard economic theory of cheating. Second, our model indicates that copayment designs aﬀect the degree of SID. For example, some forms of SID, such as upcoding, would not directly aﬀect patient benefits in countries where patients pay fixed amounts regardless of total medical costs. However, SID induces higher patient costs in Japan as patients pay a fixed percentage of total health care costs (i.e. the amount of copayment is proportional to the health care costs). As a result, the equilibrium level of SID may be higher in countries with a fixed copayment system than in Japan.

## Determinants of Prehospital Transport Time

Many epidemiological studies have been conducted on the determination of prehospital transport time, but most focus on the time from the onset of symptoms rather than from the emergency call. This is because the time from the onset of symptoms to placement of the emergency call can account for a large portion of total prehospital delay, depending on the disease. For example, [Fukuoka et al](#_bookmark14) ([2005](#_bookmark14)) reported that the median prehospital delay time was 3 h 34 min for patients with acute myocardial infarction (AMI) in Japan, which was seven times longer than the average prehospital transport time (call time to hospital acceptance time). In addition, we found no studies that investigated prehospital emergency time in general emergency episodes. Most studies on this issue have focused on specific diseases, such as AMI ([Smolderen et al](#_bookmark43), [2010](#_bookmark43)) and acute coronary syndrome ([Mooney et al](#_bookmark32), [2014](#_bookmark32)). Hence, the regression analysis presented here was designed to derive counterfactual values of hospital acceptance times in general emergency patients using the procedure outlined in Section 5. Although our focus was limited in this study, the determinants of prehospital transport time in general emergency patients are of particular interest in Japan due to recent increases in prehospital transport time, which has become an issue of public debate.

For the regression analysis, we included 2,146,498 emergency episodes. We included all emergency episodes where the 119 call was recorded as being placed between 21:00 and 3:00. Place of emergency oc- currence, patient severity and causes of the emergency were controlled in the regression model. In addition, prefecture fixed eﬀects, monthly dummy variables, and emergency call time fixed eﬀects were also incorpo- rated into the regression model. The summary statistics and estimated coeﬃcients are reported in Table [B1](#_bookmark56). The results showed that the place of emergency occurrence was associated with prehospital transport time. Compared with patients whose emergencies occurred at home, emergency calls from public facilities, workplaces and the road were more likely to have prompt transportations. When analyzed according to the severity of symptoms, our results showed that prehospital transport time for dead patients was the shortest because all hospitals can accept these patients. On the other hand, we found that prehospital transport time for living patients with more complicated and severe symptoms was likely to be delayed as these patients cannot be treated in primary EMS providers. The length of delay in patients with severe symptoms was approximately 3 minutes (0.9607+2.0438) longer than those with mild symptoms. In addition, emergency calls due to accidents and injuries had longer transport times when compared to emergency calls due to a disease. Transfers between hospitals took shorter times because these calls are likely to be promptly dealt with by hospital staﬀ.

Table B1: Determinants of Prehospital Transport Time

| Variables | Definition | Mean [S.D.] (2) | Coef [S.E] (3) |
| --- | --- | --- | --- |
| Women | Woman = 1 | 0.54 | -0.1356*** |
|  |  | (0.50) | [0.028] |
| **Place of Emergency Occurrence** |  |  |  |
| Home | In the patient’s home = 1 | 0.69 |  |
|  |  | (0.46) |  |
| Public Facility | In a public facility = 1 | 0.17 | -0.9274*** |
|  |  | (0.38) | [0.044] |
| Workplace | In the patient’s workplace = 1 | 0.01 | -1.4145*** |
|  |  | (0.10) | [0.151] |
| Road | In a public road =1 | 0.11 | -0.7954*** |
|  |  | (0.32) | [0.077] |
| Others | In other locations = 1 | 0.01 | 1.4445*** |
|  |  | (0.11) | [0.144] |
| **Severity** |  |  |  |
| Dead | Dead patient, = 1 | 0.02 | -3.3685*** |
|  |  | (0.13) | [0.103] |
| Severe | Patient with severe symptoms = 1 | 0.07 | 0.9607*** |
|  |  | (0.26) | [0.064] |
| Moderate | Patient with moderate symptoms = 1 | 0.35 |  |
|  |  | (0.48) |  |
| Mild | Patient with mild symptoms = 1 | 0.56 | -2.0438*** |
|  |  | (0.50) | [0.034] |
| **Cause** |  |  |  |
| Disease | Disease = 1 | 0.72 |  |
|  |  | (0.45) |  |
| Fire | Fire accident = 1 | 0.00 | 12.1525*** |
|  |  | (0.04) | [0.568] |
| Natural Disaster | Accident from natural disaster = 1 | 0.00 | 6.0893*** |
|  |  | (0.01) | [2.307] |
| Water | Water accident = 1 | 0.00 | 8.0572*** |
|  |  | (0.01) | [1.154] |
| Traﬃc | Traﬃc accident = 1 | 0.08 | 2.4737*** |
|  |  | (0.27) | [0.112] |
| Accident in Workplace | Accident in workplace = 1 | 0.00 | 2.2869*** |
|  |  | (0.05) | [0.287] |
| Sports | Accident due to sports and recreational activities = 1 | 0.00 | 0.6138* |
|  |  | (0.04) | [0.322] |
| General Accident | Other causes | 0.12 | 2.0052*** |
|  |  | (0.33) | [0.050] |
| Violence | Injured by someone else =1 | 0.02 | 3.7888*** |
|  |  | (0.12) | [0.137] |
| Attempted Suicide | Attempted suicide by the patient =1 | 0.02 | 6.7184*** |
|  |  | (0.12) | [0.139] |
| Hospital Transfer | Transfer from one hospital to another =1 | 0.05 | -0.9184*** |
|  |  | (0.10) | [0.336] |
| Prefecture Fixed Eﬀects |  |  | X |
| Monthly Level Fixed Eﬀects |  |  | X |
| Emergency Call Time Fixed Eﬀects |  |  | X |
| Age Group Fixed Eﬀects |  |  | X |
| Root MSE |  |  | 14.1785 |
| R Squared |  |  | 0.101 |
| Number of Observations |  |  | 2,146,498 |

Note: Results are based on ordinary least squares regression. Standard errors are clustered around the emergency call time. Age groups were also controlled by 5-year dummy variables from 0 to 100 years of age. The definitions of patient severity are described in Section 3.1.

***, *p <* 0*.*01. **, *p <* 0*.*05. *, *p <* 0*.*1.
